# Supplementary material
Source: HighWire-hosted journal article supplement (http://www.ghspjournal.org/highwire/filestream/1564/field_highwire_adjunct_files/1/SM_Zambia_SBMR_Eval_Tool_Observation_Checklist_on_ART_Follow-up_Service.pdf)
Supplement: SM_Zambia_SBMR_Eval_Tool_Observation_Checklist_on_ART_Follow-up_Service.pdf [file SM_Zambia_SBMR_Eval_Tool_Observation_Checklist_on_ART_Follow-up_Service.pdf]

Provider ID Number: \_\_\_\_\_ Patient Study ID Number: \_\_\_\_\_

## OBSERVATION CHECKLIST: Antiretroviral Treatment (ART) Follow up

### SBM-R Evaluation in Zambia

- |                                                              |                                             |
|--------------------------------------------------------------|---------------------------------------------|
| 1. Facility ID Number: _____                                 | 3. Observer ID: _____                       |
| 2. Date of observation: ____ / ____ / ____<br>DD / MM / YYYY | 4. Start Time: ____ : ____ (hours: minutes) |
|                                                              | 5. End Time: ____ : ____ (hours: minutes)   |

#### PATIENT BACKGROUND [Ask the patient questions 7-11 before the consultation begins]

6. Record sex of the patient. **[Circle one]**
- [1] Male (Go to Q8)                      [2] Female
7. Is she pregnant?
- [1] Yes                      [0] No
8. Record whether this is the first, second, or third or more follow-up visit to this facility since initiating ART **[Circle one]**
- [1] First                      [2] Second                      [3] Third or more
9. Record how many years and months this ART patient has been on ART
- \_\_\_\_\_ years and \_\_\_\_\_ months
10. Record age of patient in years: \_\_\_\_\_ years old
11. Record the main language the patient speak \_\_\_\_\_
12. Record the education level completed by the patient \_\_\_\_\_
13. Record the ethnic group of the patient \_\_\_\_\_

**Instructions to Observer:**

Mark with X in YES column if step or task is OBSERVED

Mark with X in NO column if step or task is NOT OBSERVED

Mark with X in NA (9) column if step or task is NOT APPLICABLE FOR THIS PATIENT

|            | STEP/TASK                                                                                         | YES (1) | NO (0) | NA (9) |
|------------|---------------------------------------------------------------------------------------------------|---------|--------|--------|
| <b>100</b> | <b>The provider assess the patient's condition</b><br><b>Observe whether the health provider:</b> |         |        |        |
| 101        | Greets the patient in a cordial manner and offers him/her a seat                                  |         |        |        |
| 102        | Introduces him/herself, if necessary                                                              |         |        |        |

|            | STEP/TASK                                                                                                                                                                                               | YES (1) | NO (0) | NA (9) |
|------------|---------------------------------------------------------------------------------------------------------------------------------------------------------------------------------------------------------|---------|--------|--------|
| 103        | Asks the patient about his/her well-being                                                                                                                                                               |         |        |        |
| 104        | Asks the patient if s/he has any documentation (ART card)                                                                                                                                               |         |        |        |
| 105        | Reviews medical history                                                                                                                                                                                 |         |        |        |
| 106        | Asks the patient how s/he is feeling since initiation of ART                                                                                                                                            |         |        |        |
|            | <b>Assesses for signs of opportunistic infections/Adverse reactions</b>                                                                                                                                 |         |        |        |
| 107        | Rules out pneumocystic pneumonia (asks about shortness of breath, fever, cough)                                                                                                                         |         |        |        |
| 108        | Rules out cryptococcal meningitis (asks about any 3 of the following :headache, fever, neck rigidity, confusion, photophobia)                                                                           |         |        |        |
| 109        | Rules out TB (asks about 4 of any of the following: cough, fever, weight loss, night sweats, loss of appetite, history of TB)                                                                           |         |        |        |
| 110        | Asks the patient about bad dreams, confusion, difficult in sleeping, lack of concentration in a patient on efavirenz                                                                                    |         |        |        |
| 111        | Enquires about nausea and vomiting                                                                                                                                                                      |         |        |        |
| 112        | Enquires about yellow eyes                                                                                                                                                                              |         |        |        |
| 113        | Enquires about shortness of breath                                                                                                                                                                      |         |        |        |
| 114        | Reassures the patient that some of the symptoms disappear with time                                                                                                                                     |         |        |        |
| 115        | Treats the significant side effect appropriately                                                                                                                                                        |         |        |        |
| 116        | Asks the patient if s/he has started any new medications, including traditional/herbal medications, since the last visit                                                                                |         |        |        |
| 117        | Documents concurrent medications and doses on the patient's medical record                                                                                                                              |         |        |        |
| 118        | Checks for clinically significant drug interactions according to the drug interaction table from the current National Guidelines on the Prevention and Management of Side Effects and Drug Interactions |         |        |        |
| 119        | Inquires about: contraceptive use (if applicable), pregnancy, alcohol and recreational drug use, and symptoms of depression                                                                             |         |        |        |
| 120        | Performs target physical examination (if indicated), including weight monitoring                                                                                                                        |         |        |        |
| 121        | Requests and reviews laboratory tests                                                                                                                                                                   |         |        |        |
| 122        | Records findings                                                                                                                                                                                        |         |        |        |
| <b>200</b> | <b>The provider verifies how the patient is taking ART and cotrimoxazole prophylaxis (if applicable)</b><br><b>Observe whether the health provider:</b>                                                 |         |        |        |
| 201        | Asks the patient whether they missed any ART or co-trimoxazole doses                                                                                                                                    |         |        |        |
| 202        | Asks the patient to explain how they are taking their medications                                                                                                                                       |         |        |        |
| 203        | Asks the patient the time they take the medications                                                                                                                                                     |         |        |        |
| 204        | Asks the patient to if she or he has any remaining medications                                                                                                                                          |         |        |        |
| 205        | Asks about an adherence supporter                                                                                                                                                                       |         |        |        |
| 206        | Explains/asks the patient why they are taking co-trimoxazole where applicable                                                                                                                           |         |        |        |
| 207        | Re-inforces the need for the patient to be adherent                                                                                                                                                     |         |        |        |
| 208        | If the patient has missed doses, investigates how to improve adherence (e.g., access to adherence supporter, exploration of different dosing schedules, use of adherence reminders, etc.)               |         |        |        |
| 209        | Addresses concerns about ART raised by the patient                                                                                                                                                      |         |        |        |
| <b>300</b> | <b>The provider addresses identified issues</b><br><b>Observe whether the health provider:</b>                                                                                                          |         |        |        |
| 301        | Treats opportunistic infections, if any, according to current national guidelines and protocols                                                                                                         |         |        |        |

|            | STEP/TASK                                                                                                                                                                                                         | YES (1) | NO (0) | NA (9) |
|------------|-------------------------------------------------------------------------------------------------------------------------------------------------------------------------------------------------------------------|---------|--------|--------|
| 302        | Reinforces how to take ART (e.g., number of pills, food requirements, dosing times, etc.) and the importance of adherence                                                                                         |         |        |        |
| 303        | Identifies, grades, and manages adverse reactions according to the National Guidelines on Prevention and Management of Side Effects and Drug Interactions                                                         |         |        |        |
| 304        | Identifies, grades, and manages laboratory abnormalities according to the National Guidelines on the Prevention and Management of Side Effects and Drug Interactions                                              |         |        |        |
| 305        | Manages paresthesia and/or neuro-sensory impairment according to the National Guidelines on the Prevention and Management of Side Effects and Drug Interactions and the National ART Treatment Guidelines         |         |        |        |
| 306        | Manages rash of patients on EFV- or NVP-containing regimens according to the National Guidelines on the Prevention and Management of Side Effects and Drug Interactions and the National ART Treatment Guidelines |         |        |        |
| 307        | Manages hyperlactacidemia and lactic acidosis according to the National Guidelines on the Prevention and Management of Side Effects and Drug Interactions and the National ART Treatment Guidelines               |         |        |        |
| 308        | Confirms that the patient has an adherence supporter and asks how it is working                                                                                                                                   |         |        |        |
| 309        | Advises the patient always to boil drinking water for at least 10 min, cool it and then cover                                                                                                                     |         |        |        |
| 310        | Advises the client to eat freshly cooked food especially if they have no refrigerator                                                                                                                             |         |        |        |
| 311        | Tells the patient to avoid eating excessive fat meals especially when they are on efavirenz                                                                                                                       |         |        |        |
| 312        | Tells the patient to wash their hands thoroughly before handling food                                                                                                                                             |         |        |        |
| 313        | Tells the patients to thorough wash fruits and vegetables before eating them                                                                                                                                      |         |        |        |
| 314        | Refers the patient to the appropriate support services for any social need raised by the patient                                                                                                                  |         |        |        |
| <b>400</b> | <b>The provider finalizes the consultation</b><br><b>Observe whether the health provider:</b>                                                                                                                     |         |        |        |
| 401        | Asks if the patient has questions and addresses them                                                                                                                                                              |         |        |        |
| 402        | Determines time frame for follow-up visit                                                                                                                                                                         |         |        |        |
| 403        | Shows the patient where to go next                                                                                                                                                                                |         |        |        |
| 404        | Completes registers and other forms                                                                                                                                                                               |         |        |        |
| 405        | Completes the Adverse Drug Reaction Report Form, if applicable                                                                                                                                                    |         |        |        |

**END OF CHECKLIST**
